# Supplementary material
Source: publisher figshare collection journal article supplement (https://acs.figshare.com/ndownloader/files/3712585)
Supplement: Supplementary file 1 [file 3712585]

 
data_1
 
_audit_creation_method            SHELXL-97 
_chemical_name_systematic 
; 
 ? 
; 
_chemical_name_common             ? 
_chemical_melting_point           ? 
_chemical_formula_moiety          ? 
_chemical_formula_sum 
 'C26 H23 N2 O6 Ru' 
_chemical_formula_weight          560.53 
 
loop_ 
 _atom_type_symbol 
 _atom_type_description 
 _atom_type_scat_dispersion_real 
 _atom_type_scat_dispersion_imag 
 _atom_type_scat_source 
 'C'  'C'   0.0033   0.0016 
 'International Tables Vol C Tables 4.2.6.8 and 6.1.1.4' 
 'H'  'H'   0.0000   0.0000 
 'International Tables Vol C Tables 4.2.6.8 and 6.1.1.4' 
 'N'  'N'   0.0061   0.0033 
 'International Tables Vol C Tables 4.2.6.8 and 6.1.1.4' 
 'O'  'O'   0.0106   0.0060 
 'International Tables Vol C Tables 4.2.6.8 and 6.1.1.4' 
 'Ru'  'Ru'  -1.2594   0.8363 
 'International Tables Vol C Tables 4.2.6.8 and 6.1.1.4' 
 
_symmetry_cell_setting            'triclinic' 
_symmetry_space_group_name_H-M    'P-1' 
 
loop_ 
 _symmetry_equiv_pos_as_xyz 
 'x, y, z' 
 '-x, -y, -z' 
 
_cell_length_a                    12.324(3) 
_cell_length_b                    14.398(3) 
_cell_length_c                    15.023(2) 
_cell_angle_alpha                 68.238(6) 
_cell_angle_beta                  75.385(7) 
_cell_angle_gamma                 89.338(9) 
_cell_volume                      2385.6(8) 
_cell_formula_units_Z             4 
_cell_measurement_temperature     100(2) 
_cell_measurement_reflns_used     ? 
_cell_measurement_theta_min       ? 
_cell_measurement_theta_max       ? 
 
_exptl_crystal_description        plate 
_exptl_crystal_colour             blue 
_exptl_crystal_size_max           0.48 
_exptl_crystal_size_mid           0.28 
_exptl_crystal_size_min           0.04 
_exptl_crystal_density_meas       ? 
_exptl_crystal_density_diffrn     1.561 
_exptl_crystal_density_method     'not measured' 
_exptl_crystal_F_000              1140 
_exptl_absorpt_coefficient_mu     0.702 
_exptl_absorpt_correction_type    numerical 
_exptl_absorpt_correction_T_min   0.7292 
_exptl_absorpt_correction_T_max   0.9725 
_exptl_absorpt_process_details    'Busing, W. R.; Levy, H. A. Acta Crystallogr. 1957, 10, 180-182'
 
_exptl_special_details 
; 
 ? 
; 
 
_diffrn_ambient_temperature       100(2) 
_diffrn_radiation_wavelength      0.71070 
_diffrn_radiation_type            MoK\a 
_diffrn_radiation_source          'fine-focus sealed tube' 
_diffrn_radiation_monochromator   graphite 
_diffrn_measurement_device_type   'Rigaku Saturn724+ (4x4 bin mode)' 
_diffrn_measurement_method        'profile data from \w-scans'
_diffrn_detector_area_resol_mean  ? 
_diffrn_reflns_number             21576 
_diffrn_reflns_av_R_equivalents   0.0755 
_diffrn_reflns_av_sigmaI/netI     0.0967 
_diffrn_reflns_limit_h_min        -14 
_diffrn_reflns_limit_h_max        14 
_diffrn_reflns_limit_k_min        -17 
_diffrn_reflns_limit_k_max        17 
_diffrn_reflns_limit_l_min        -16 
_diffrn_reflns_limit_l_max        17 
_diffrn_reflns_theta_min          3.06 
_diffrn_reflns_theta_max          25.00 
_reflns_number_total              8364 
_reflns_number_gt                 6556 
_reflns_threshold_expression      >2sigma(I) 
 
_computing_data_collection        ? 
_computing_cell_refinement        ? 
_computing_data_reduction         ? 
_computing_structure_solution     'SHELXS-97 (Sheldrick, 2008)' 
_computing_structure_refinement   'SHELXL-97 (Sheldrick, 2008)' 
_computing_molecular_graphics     ? 
_computing_publication_material   ? 
 
_refine_special_details 
; 
 Refinement of F^2^ against ALL reflections.  The weighted R-factor wR and 
 goodness of fit S are based on F^2^, conventional R-factors R are based 
 on F, with F set to zero for negative F^2^. The threshold expression of 
 F^2^ > 2sigma(F^2^) is used only for calculating R-factors(gt) etc. and is 
 not relevant to the choice of reflections for refinement.  R-factors based 
 on F^2^ are statistically about twice as large as those based on F, and R- 
 factors based on ALL data will be even larger. 
; 
 
_refine_ls_structure_factor_coef  Fsqd  
_refine_ls_matrix_type            full 
_refine_ls_weighting_scheme       calc  
_refine_ls_weighting_details 
 'calc w=1/[\s^2^(Fo^2^)+(0.0298P)^2^+0.0000P] where P=(Fo^2^+2Fc^2^)/3' 
_atom_sites_solution_primary      direct 
_atom_sites_solution_secondary    difmap 
_atom_sites_solution_hydrogens    geom 
_refine_ls_hydrogen_treatment     mixed 
_refine_ls_extinction_method      none 
_refine_ls_extinction_coef        ? 
_refine_ls_number_reflns          8364 
_refine_ls_number_parameters      631 
_refine_ls_number_restraints      0 
_refine_ls_R_factor_all           0.0554 
_refine_ls_R_factor_gt            0.0441 
_refine_ls_wR_factor_ref          0.1031 
_refine_ls_wR_factor_gt           0.0962 
_refine_ls_goodness_of_fit_ref    0.989 
_refine_ls_restrained_S_all       0.989 
_refine_ls_shift/su_max           0.001 
_refine_ls_shift/su_mean          0.000 
 
loop_ 
 _atom_site_label 
 _atom_site_type_symbol 
 _atom_site_fract_x 
 _atom_site_fract_y 
 _atom_site_fract_z 
 _atom_site_U_iso_or_equiv 
 _atom_site_adp_type 
 _atom_site_occupancy 
 _atom_site_symmetry_multiplicity 
 _atom_site_calc_flag 
 _atom_site_refinement_flags 
 _atom_site_disorder_assembly 
 _atom_site_disorder_group 
Ru1 Ru 0.63487(3) 0.62508(2) 0.66136(2) 0.01145(10) Uani 1 1 d . . . 
Ru2 Ru 1.09821(3) 0.86804(2) 0.78461(2) 0.01423(10) Uani 1 1 d . . . 
O1 O 0.6560(3) 0.2606(2) 0.9282(2) 0.0240(7) Uani 1 1 d . . . 
O2 O 0.6114(2) 0.64975(19) 0.78836(18) 0.0140(6) Uani 1 1 d . . . 
O3 O 0.6640(2) 0.77728(19) 0.58699(19) 0.0143(6) Uani 1 1 d . . . 
O4 O 0.4689(2) 0.62910(19) 0.66250(19) 0.0149(6) Uani 1 1 d . . . 
O5 O 0.7977(2) 0.62419(19) 0.66097(19) 0.0145(6) Uani 1 1 d . . . 
O6 O 0.6647(2) 0.6144(2) 0.52783(19) 0.0156(6) Uani 1 1 d . . . 
O7 O 0.6914(2) 0.9105(2) 0.7180(2) 0.0211(7) Uani 1 1 d . . . 
O8 O 1.1331(2) 0.8947(2) 0.63779(19) 0.0160(6) Uani 1 1 d . . . 
O9 O 1.1533(2) 1.0085(2) 0.7638(2) 0.0207(7) Uani 1 1 d . . . 
O10 O 1.2546(2) 0.8192(2) 0.7838(2) 0.0187(7) Uani 1 1 d . . . 
O11 O 1.0748(2) 0.8326(2) 0.9311(2) 0.0192(7) Uani 1 1 d . . . 
O12 O 1.0445(2) 0.72988(19) 0.80232(19) 0.0160(6) Uani 1 1 d . . . 
N1 N 0.6171(3) 0.4775(2) 0.7338(2) 0.0121(7) Uani 1 1 d . . . 
N2 N 0.6679(3) 0.4377(3) 0.9774(2) 0.0177(8) Uani 1 1 d . . . 
H2 H 0.6816 0.3748 1.0048 0.021 Uiso 1 1 calc R . . 
N3 N 0.9425(3) 0.9053(2) 0.7900(2) 0.0159(8) Uani 1 1 d . . . 
N4 N 0.8799(3) 0.8630(2) 0.5795(2) 0.0154(8) Uani 1 1 d . . . 
H4A H 0.8064 0.8593 0.5888 0.019 Uiso 1 1 calc R . . 
C1 C 0.5898(3) 0.3990(3) 0.7038(3) 0.0123(9) Uani 1 1 d . . . 
C2 C 0.5501(3) 0.4076(3) 0.6234(3) 0.0151(9) Uani 1 1 d . . . 
H2A H 0.5363 0.4711 0.5798 0.018 Uiso 1 1 calc R . . 
C3 C 0.5309(3) 0.3201(3) 0.6084(3) 0.0196(10) Uani 1 1 d . . . 
H3 H 0.5036 0.3243 0.5534 0.024 Uiso 1 1 calc R . . 
C4 C 0.5506(3) 0.2269(3) 0.6715(3) 0.0189(10) Uani 1 1 d . . . 
H4 H 0.5403 0.1690 0.6575 0.023 Uiso 1 1 calc R . . 
C5 C 0.5854(3) 0.2180(3) 0.7553(3) 0.0199(10) Uani 1 1 d . . . 
H5 H 0.5959 0.1541 0.8005 0.024 Uiso 1 1 calc R . . 
C6 C 0.6042(3) 0.3049(3) 0.7711(3) 0.0149(9) Uani 1 1 d . . . 
C7 C 0.6365(3) 0.3208(3) 0.8529(3) 0.0178(10) Uani 1 1 d . . . 
C8 C 0.6372(3) 0.4319(3) 0.8244(3) 0.0139(9) Uani 1 1 d . . . 
C9 C 0.6497(3) 0.4819(3) 0.8842(3) 0.0148(9) Uani 1 1 d . . . 
C10 C 0.6319(3) 0.5855(3) 0.8662(3) 0.0144(9) Uani 1 1 d . . . 
C11 C 0.6398(3) 0.6004(3) 0.9545(3) 0.0148(9) Uani 1 1 d . . . 
C12 C 0.6335(3) 0.6858(3) 0.9794(3) 0.0181(10) Uani 1 1 d . . . 
H12 H 0.6203 0.7489 0.9347 0.022 Uiso 1 1 calc R . . 
C13 C 0.6475(3) 0.6743(3) 1.0718(3) 0.0221(10) Uani 1 1 d . . . 
H13 H 0.6449 0.7307 1.0905 0.027 Uiso 1 1 calc R . . 
C14 C 0.6652(4) 0.5815(4) 1.1370(3) 0.0257(11) Uani 1 1 d . . . 
H14 H 0.6721 0.5758 1.2004 0.031 Uiso 1 1 calc R . . 
C15 C 0.6732(4) 0.4970(3) 1.1136(3) 0.0214(10) Uani 1 1 d . . . 
H15 H 0.6865 0.4342 1.1589 0.026 Uiso 1 1 calc R . . 
C16 C 0.6611(3) 0.5081(3) 1.0208(3) 0.0177(10) Uani 1 1 d . . . 
C17 C 0.3014(3) 0.6922(3) 0.6272(3) 0.0162(9) Uani 1 1 d . . . 
H17A H 0.2596 0.6692 0.6975 0.019 Uiso 1 1 calc R . . 
H17B H 0.2889 0.6417 0.6007 0.019 Uiso 1 1 calc R . . 
H17C H 0.2752 0.7557 0.5898 0.019 Uiso 1 1 calc R . . 
C18 C 0.4246(3) 0.7075(3) 0.6175(3) 0.0135(9) Uani 1 1 d . . . 
C19 C 0.4807(3) 0.8036(3) 0.5615(3) 0.0151(9) Uani 1 1 d . . . 
H19 H 0.4382 0.8535 0.5278 0.018 Uiso 1 1 calc R . . 
C20 C 0.5921(3) 0.8337(3) 0.5500(3) 0.0128(9) Uani 1 1 d . . . 
C21 C 0.6375(3) 0.9426(3) 0.4917(3) 0.0175(9) Uani 1 1 d . . . 
H21A H 0.6515 0.9724 0.5372 0.021 Uiso 1 1 calc R . . 
H21B H 0.5824 0.9793 0.4583 0.021 Uiso 1 1 calc R . . 
H21C H 0.7081 0.9465 0.4419 0.021 Uiso 1 1 calc R . . 
C22 C 0.7610(4) 0.5781(3) 0.3896(3) 0.0232(10) Uani 1 1 d . . . 
H22A H 0.7410 0.6393 0.3423 0.028 Uiso 1 1 calc R . . 
H22B H 0.7060 0.5219 0.4053 0.028 Uiso 1 1 calc R . . 
H22C H 0.8362 0.5632 0.3603 0.028 Uiso 1 1 calc R . . 
C23 C 0.7605(4) 0.5936(3) 0.4839(3) 0.0169(9) Uani 1 1 d . . . 
C24 C 0.8584(3) 0.5860(3) 0.5151(3) 0.0184(10) Uani 1 1 d . . . 
H24 H 0.9215 0.5657 0.4775 0.022 Uiso 1 1 calc R . . 
C25 C 0.8738(4) 0.6050(3) 0.5967(3) 0.0168(9) Uani 1 1 d . . . 
C26 C 0.9899(4) 0.6016(3) 0.6127(3) 0.0257(11) Uani 1 1 d . . . 
H26A H 0.9880 0.5496 0.6777 0.031 Uiso 1 1 calc R . . 
H26B H 1.0147 0.6670 0.6107 0.031 Uiso 1 1 calc R . . 
H26C H 1.0424 0.5861 0.5602 0.031 Uiso 1 1 calc R . . 
C27 C 0.8676(3) 0.9400(3) 0.8579(3) 0.0168(9) Uani 1 1 d . . . 
C28 C 0.8928(4) 0.9755(3) 0.9254(3) 0.0223(10) Uani 1 1 d . . . 
H28 H 0.9670 0.9766 0.9329 0.027 Uiso 1 1 calc R . . 
C29 C 0.8057(4) 1.0092(3) 0.9817(3) 0.0253(11) Uani 1 1 d . . . 
H29 H 0.8216 1.0358 1.0267 0.030 Uiso 1 1 calc R . . 
C30 C 0.6960(4) 1.0050(3) 0.9735(3) 0.0238(11) Uani 1 1 d . . . 
H30 H 0.6374 1.0254 1.0152 0.029 Uiso 1 1 calc R . . 
C31 C 0.6720(4) 0.9710(3) 0.9045(3) 0.0202(10) Uani 1 1 d . . . 
H31 H 0.5974 0.9685 0.8980 0.024 Uiso 1 1 calc R . . 
C32 C 0.7591(3) 0.9410(3) 0.8454(3) 0.0141(9) Uani 1 1 d . . . 
C33 C 0.7651(3) 0.9141(3) 0.7589(3) 0.0152(9) Uani 1 1 d . . . 
C34 C 0.8846(3) 0.8947(3) 0.7278(3) 0.0172(10) Uani 1 1 d . . . 
C35 C 0.9353(3) 0.8760(3) 0.6433(3) 0.0143(9) Uani 1 1 d . . . 
C36 C 1.0546(3) 0.8806(3) 0.6007(3) 0.0132(9) Uani 1 1 d . . . 
C37 C 1.0676(3) 0.8691(3) 0.5072(3) 0.0134(9) Uani 1 1 d . . . 
C42 C 0.9575(3) 0.8567(3) 0.4990(3) 0.0131(9) Uani 1 1 d . . . 
C41 C 0.9394(4) 0.8406(3) 0.4177(3) 0.0190(10) Uani 1 1 d . . . 
H41 H 0.8654 0.8337 0.4113 0.023 Uiso 1 1 calc R . . 
C40 C 1.0319(4) 0.8350(3) 0.3473(3) 0.0219(10) Uani 1 1 d . . . 
H40 H 1.0213 0.8237 0.2915 0.026 Uiso 1 1 calc R . . 
C39 C 1.1428(4) 0.8456(3) 0.3550(3) 0.0217(10) Uani 1 1 d . . . 
H39 H 1.2051 0.8405 0.3053 0.026 Uiso 1 1 calc R . . 
C38 C 1.1607(4) 0.8632(3) 0.4345(3) 0.0197(10) Uani 1 1 d . . . 
H38 H 1.2350 0.8712 0.4397 0.024 Uiso 1 1 calc R . . 
C43 C 1.4350(3) 0.8115(3) 0.8111(3) 0.0202(10) Uani 1 1 d . . . 
H43A H 1.4666 0.7877 0.7575 0.024 Uiso 1 1 calc R . . 
H43B H 1.4104 0.7539 0.8744 0.024 Uiso 1 1 calc R . . 
H43C H 1.4925 0.8552 0.8150 0.024 Uiso 1 1 calc R . . 
C44 C 1.3363(3) 0.8692(3) 0.7902(3) 0.0165(9) Uani 1 1 d . . . 
C45 C 1.3378(3) 0.9690(3) 0.7822(3) 0.0185(10) Uani 1 1 d . . . 
H45 H 1.4044 0.9968 0.7875 0.022 Uiso 1 1 calc R . . 
C46 C 1.2517(4) 1.0325(3) 0.7672(3) 0.0194(10) Uani 1 1 d . . . 
C47 C 1.2702(4) 1.1408(3) 0.7537(4) 0.0304(12) Uani 1 1 d . . . 
H47A H 1.2149 1.1541 0.8062 0.036 Uiso 1 1 calc R . . 
H47B H 1.2613 1.1846 0.6886 0.036 Uiso 1 1 calc R . . 
H47C H 1.3463 1.1542 0.7575 0.036 Uiso 1 1 calc R . . 
C48 C 1.0036(5) 0.7410(4) 1.1027(3) 0.0412(14) Uani 1 1 d . . . 
H48A H 0.9647 0.7972 1.1136 0.049 Uiso 1 1 calc R . . 
H48B H 1.0777 0.7415 1.1156 0.049 Uiso 1 1 calc R . . 
H48C H 0.9591 0.6776 1.1479 0.049 Uiso 1 1 calc R . . 
C49 C 1.0183(4) 0.7514(3) 0.9965(3) 0.0225(10) Uani 1 1 d . . . 
C50 C 0.9714(4) 0.6746(3) 0.9779(3) 0.0271(11) Uani 1 1 d . . . 
H50 H 0.9223 0.6235 1.0333 0.032 Uiso 1 1 calc R . . 
C51 C 0.9896(3) 0.6656(3) 0.8859(3) 0.0202(10) Uani 1 1 d . . . 
C52 C 0.9420(4) 0.5725(3) 0.8810(3) 0.0275(11) Uani 1 1 d . . . 
H52A H 1.0035 0.5389 0.8535 0.033 Uiso 1 1 calc R . . 
H52B H 0.8905 0.5908 0.8383 0.033 Uiso 1 1 calc R . . 
H52C H 0.9009 0.5270 0.9480 0.033 Uiso 1 1 calc R . . 
 
loop_ 
 _atom_site_aniso_label 
 _atom_site_aniso_U_11 
 _atom_site_aniso_U_22 
 _atom_site_aniso_U_33 
 _atom_site_aniso_U_23 
 _atom_site_aniso_U_13 
 _atom_site_aniso_U_12 
Ru1 0.01236(19) 0.01174(18) 0.01157(18) -0.00488(13) -0.00486(15) 0.00285(13) 
Ru2 0.01141(19) 0.0166(2) 0.0170(2) -0.00750(15) -0.00598(15) 0.00256(14) 
O1 0.0358(19) 0.0173(17) 0.0188(16) -0.0031(13) -0.0133(15) 0.0067(14) 
O2 0.0159(15) 0.0172(15) 0.0120(15) -0.0072(12) -0.0067(13) 0.0014(12) 
O3 0.0143(15) 0.0143(15) 0.0171(15) -0.0073(12) -0.0070(13) 0.0017(12) 
O4 0.0121(15) 0.0178(16) 0.0176(15) -0.0073(12) -0.0081(13) 0.0048(12) 
O5 0.0147(15) 0.0149(15) 0.0152(15) -0.0054(12) -0.0069(13) 0.0026(12) 
O6 0.0156(16) 0.0201(16) 0.0121(15) -0.0065(12) -0.0050(13) 0.0033(12) 
O7 0.0111(15) 0.0294(18) 0.0236(17) -0.0103(14) -0.0056(14) -0.0003(13) 
O8 0.0113(15) 0.0200(16) 0.0178(15) -0.0065(12) -0.0064(13) -0.0014(12) 
O9 0.0167(16) 0.0205(17) 0.0265(17) -0.0094(13) -0.0078(14) 0.0007(13) 
O10 0.0122(16) 0.0231(17) 0.0252(17) -0.0138(13) -0.0055(14) 0.0050(12) 
O11 0.0145(16) 0.0281(18) 0.0206(16) -0.0115(14) -0.0111(14) 0.0069(13) 
O12 0.0140(15) 0.0168(16) 0.0154(15) -0.0044(12) -0.0036(13) 0.0023(12) 
N1 0.0159(19) 0.0110(18) 0.0121(18) -0.0054(14) -0.0071(15) 0.0041(14) 
N2 0.022(2) 0.017(2) 0.0140(18) -0.0036(15) -0.0088(17) 0.0032(15) 
N3 0.0125(19) 0.022(2) 0.0160(19) -0.0099(15) -0.0049(16) 0.0020(15) 
N4 0.0116(18) 0.022(2) 0.0147(18) -0.0072(15) -0.0065(16) 0.0007(14) 
C1 0.013(2) 0.009(2) 0.015(2) -0.0062(16) -0.0025(18) 0.0029(16) 
C2 0.015(2) 0.016(2) 0.014(2) -0.0052(17) -0.0051(19) 0.0019(17) 
C3 0.017(2) 0.027(3) 0.016(2) -0.0099(19) -0.004(2) -0.0010(19) 
C4 0.019(2) 0.015(2) 0.024(2) -0.0116(19) -0.001(2) -0.0024(18) 
C5 0.020(2) 0.011(2) 0.024(2) -0.0043(18) -0.003(2) -0.0016(17) 
C6 0.016(2) 0.015(2) 0.014(2) -0.0049(17) -0.0059(19) 0.0031(17) 
C7 0.015(2) 0.018(2) 0.020(2) -0.0089(19) 0.000(2) 0.0020(17) 
C8 0.015(2) 0.014(2) 0.013(2) -0.0040(17) -0.0062(18) 0.0052(17) 
C9 0.014(2) 0.017(2) 0.009(2) -0.0014(17) -0.0012(18) 0.0003(17) 
C10 0.014(2) 0.014(2) 0.013(2) -0.0058(17) 0.0009(19) -0.0014(17) 
C11 0.011(2) 0.019(2) 0.014(2) -0.0058(18) -0.0038(18) -0.0009(17) 
C12 0.013(2) 0.024(2) 0.018(2) -0.0107(19) -0.0009(19) 0.0006(18) 
C13 0.018(2) 0.034(3) 0.021(2) -0.019(2) -0.002(2) -0.001(2) 
C14 0.021(3) 0.044(3) 0.015(2) -0.016(2) -0.004(2) 0.001(2) 
C15 0.024(3) 0.026(3) 0.014(2) -0.0048(19) -0.007(2) -0.0016(19) 
C16 0.019(2) 0.022(2) 0.011(2) -0.0061(18) -0.0028(19) -0.0014(18) 
C17 0.015(2) 0.017(2) 0.019(2) -0.0080(18) -0.008(2) 0.0030(17) 
C18 0.017(2) 0.020(2) 0.009(2) -0.0100(17) -0.0056(19) 0.0050(18) 
C19 0.019(2) 0.016(2) 0.017(2) -0.0082(18) -0.015(2) 0.0085(17) 
C20 0.021(2) 0.010(2) 0.012(2) -0.0069(17) -0.0067(19) 0.0057(17) 
C21 0.019(2) 0.012(2) 0.020(2) -0.0034(18) -0.006(2) -0.0003(17) 
C22 0.029(3) 0.029(3) 0.017(2) -0.014(2) -0.007(2) 0.007(2) 
C23 0.025(3) 0.010(2) 0.018(2) -0.0060(17) -0.007(2) 0.0066(17) 
C24 0.015(2) 0.021(2) 0.021(2) -0.0128(19) -0.002(2) 0.0054(18) 
C25 0.020(2) 0.008(2) 0.019(2) -0.0012(17) -0.006(2) 0.0044(17) 
C26 0.020(3) 0.032(3) 0.033(3) -0.018(2) -0.013(2) 0.011(2) 
C27 0.020(2) 0.013(2) 0.018(2) -0.0071(18) -0.004(2) 0.0039(17) 
C28 0.022(3) 0.026(3) 0.024(2) -0.011(2) -0.013(2) 0.0060(19) 
C29 0.029(3) 0.029(3) 0.023(3) -0.016(2) -0.009(2) 0.007(2) 
C30 0.027(3) 0.022(3) 0.024(3) -0.014(2) -0.003(2) 0.008(2) 
C31 0.019(2) 0.017(2) 0.022(2) -0.0057(19) -0.005(2) 0.0019(18) 
C32 0.017(2) 0.011(2) 0.014(2) -0.0042(17) -0.0037(19) 0.0008(17) 
C33 0.014(2) 0.010(2) 0.019(2) -0.0037(17) -0.003(2) -0.0022(16) 
C34 0.018(2) 0.013(2) 0.019(2) -0.0055(18) -0.003(2) -0.0001(17) 
C35 0.014(2) 0.015(2) 0.016(2) -0.0056(17) -0.0083(19) 0.0016(17) 
C36 0.013(2) 0.009(2) 0.016(2) -0.0016(17) -0.0053(19) 0.0014(16) 
C37 0.012(2) 0.013(2) 0.015(2) -0.0040(17) -0.0060(19) 0.0045(16) 
C42 0.014(2) 0.011(2) 0.013(2) -0.0031(17) -0.0035(19) 0.0030(16) 
C41 0.020(2) 0.019(2) 0.018(2) -0.0049(19) -0.009(2) 0.0035(18) 
C40 0.031(3) 0.021(2) 0.016(2) -0.0072(18) -0.010(2) 0.002(2) 
C39 0.026(3) 0.021(2) 0.016(2) -0.0062(19) -0.001(2) 0.0054(19) 
C38 0.015(2) 0.021(2) 0.018(2) -0.0028(18) -0.003(2) 0.0003(18) 
C43 0.014(2) 0.024(3) 0.021(2) -0.0074(19) -0.005(2) 0.0017(18) 
C44 0.013(2) 0.027(3) 0.007(2) -0.0056(18) 0.0002(18) -0.0007(18) 
C45 0.016(2) 0.023(2) 0.021(2) -0.0110(19) -0.008(2) -0.0003(18) 
C46 0.018(2) 0.025(3) 0.016(2) -0.0094(19) -0.004(2) -0.0004(19) 
C47 0.023(3) 0.024(3) 0.048(3) -0.016(2) -0.012(2) 0.001(2) 
C48 0.062(4) 0.042(3) 0.019(3) -0.011(2) -0.013(3) 0.012(3) 
C49 0.026(3) 0.024(3) 0.018(2) -0.008(2) -0.007(2) 0.015(2) 
C50 0.031(3) 0.023(3) 0.022(3) -0.006(2) -0.003(2) 0.003(2) 
C51 0.012(2) 0.020(2) 0.028(3) -0.009(2) -0.006(2) 0.0043(18) 
C52 0.023(3) 0.023(3) 0.033(3) -0.008(2) -0.005(2) -0.002(2) 
 
_geom_special_details 
; 
 All esds (except the esd in the dihedral angle between two l.s. planes) 
 are estimated using the full covariance matrix.  The cell esds are taken 
 into account individually in the estimation of esds in distances, angles 
 and torsion angles; correlations between esds in cell parameters are only 
 used when they are defined by crystal symmetry.  An approximate (isotropic) 
 treatment of cell esds is used for estimating esds involving l.s. planes. 
; 
 
loop_ 
 _geom_bond_atom_site_label_1 
 _geom_bond_atom_site_label_2 
 _geom_bond_distance 
 _geom_bond_site_symmetry_2 
 _geom_bond_publ_flag 
Ru1 N1 1.980(3) . ? 
Ru1 O5 2.005(3) . ? 
Ru1 O6 2.010(3) . ? 
Ru1 O2 2.018(3) . ? 
Ru1 O4 2.042(3) . ? 
Ru1 O3 2.044(3) 1 ? 
Ru1 O3 2.044(3) . ? 
Ru2 N3 1.977(3) . ? 
Ru2 O12 2.004(3) . ? 
Ru2 O11 2.010(3) . ? 
Ru2 O8 2.024(3) . ? 
Ru2 O9 2.026(3) . ? 
Ru2 O10 2.042(3) . ? 
O1 C7 1.223(5) . ? 
O2 C10 1.276(4) . ? 
O3 O3 0.000(5) 1 ? 
O3 C20 1.285(5) . ? 
O4 C18 1.279(4) . ? 
O5 C25 1.273(5) . ? 
O6 C23 1.290(5) . ? 
O7 C33 1.230(5) . ? 
O8 C36 1.284(4) . ? 
O9 C46 1.282(5) . ? 
O10 C44 1.288(5) . ? 
O11 C49 1.280(5) . ? 
O12 C51 1.271(5) . ? 
N1 C8 1.360(5) . ? 
N1 C1 1.434(4) . ? 
N2 C9 1.382(5) . ? 
N2 C16 1.386(5) . ? 
N2 H2 0.8800 . ? 
N3 C34 1.360(5) . ? 
N3 C27 1.426(5) . ? 
N4 C42 1.372(5) . ? 
N4 C35 1.373(5) . ? 
N4 H4A 0.8800 . ? 
C1 C2 1.378(5) . ? 
C1 C6 1.399(5) . ? 
C2 C3 1.393(5) . ? 
C2 H2A 0.9500 . ? 
C3 C4 1.387(5) . ? 
C3 H3 0.9500 . ? 
C4 C5 1.391(5) . ? 
C4 H4 0.9500 . ? 
C5 C6 1.390(5) . ? 
C5 H5 0.9500 . ? 
C6 C7 1.476(5) . ? 
C7 C8 1.495(5) . ? 
C8 C9 1.378(5) . ? 
C9 C10 1.438(5) . ? 
C10 C11 1.448(5) . ? 
C11 C16 1.403(5) . ? 
C11 C12 1.407(5) . ? 
C12 C13 1.392(5) . ? 
C12 H12 0.9500 . ? 
C13 C14 1.387(6) . ? 
C13 H13 0.9500 . ? 
C14 C15 1.382(6) . ? 
C14 H14 0.9500 . ? 
C15 C16 1.390(5) . ? 
C15 H15 0.9500 . ? 
C17 C18 1.500(5) . ? 
C17 H17A 0.9800 . ? 
C17 H17B 0.9800 . ? 
C17 H17C 0.9800 . ? 
C18 C19 1.401(5) . ? 
C19 C20 1.393(5) . ? 
C19 H19 0.9500 . ? 
C20 O3 1.285(5) 1 ? 
C20 C21 1.515(5) . ? 
C21 H21A 0.9800 . ? 
C21 H21B 0.9800 . ? 
C21 H21C 0.9800 . ? 
C22 C23 1.511(5) . ? 
C22 H22A 0.9800 . ? 
C22 H22B 0.9800 . ? 
C22 H22C 0.9800 . ? 
C23 C24 1.390(6) . ? 
C24 C25 1.408(5) . ? 
C24 H24 0.9500 . ? 
C25 C26 1.506(5) . ? 
C26 H26A 0.9800 . ? 
C26 H26B 0.9800 . ? 
C26 H26C 0.9800 . ? 
C27 C28 1.391(5) . ? 
C27 C32 1.395(6) . ? 
C28 C29 1.391(6) . ? 
C28 H28 0.9500 . ? 
C29 C30 1.392(6) . ? 
C29 H29 0.9500 . ? 
C30 C31 1.393(5) . ? 
C30 H30 0.9500 . ? 
C31 C32 1.386(5) . ? 
C31 H31 0.9500 . ? 
C32 C33 1.472(5) . ? 
C33 C34 1.485(5) . ? 
C34 C35 1.387(5) . ? 
C35 C36 1.440(5) . ? 
C36 C37 1.444(5) . ? 
C37 C38 1.397(5) . ? 
C37 C42 1.413(5) . ? 
C42 C41 1.394(5) . ? 
C41 C40 1.371(6) . ? 
C41 H41 0.9500 . ? 
C40 C39 1.415(6) . ? 
C40 H40 0.9500 . ? 
C39 C38 1.377(5) . ? 
C39 H39 0.9500 . ? 
C38 H38 0.9500 . ? 
C43 C44 1.498(5) . ? 
C43 H43A 0.9800 . ? 
C43 H43B 0.9800 . ? 
C43 H43C 0.9800 . ? 
C44 C45 1.397(6) . ? 
C45 C46 1.399(6) . ? 
C45 H45 0.9500 . ? 
C46 C47 1.509(5) . ? 
C47 H47A 0.9800 . ? 
C47 H47B 0.9800 . ? 
C47 H47C 0.9800 . ? 
C48 C49 1.509(6) . ? 
C48 H48A 0.9800 . ? 
C48 H48B 0.9800 . ? 
C48 H48C 0.9800 . ? 
C49 C50 1.401(6) . ? 
C50 C51 1.397(6) . ? 
C50 H50 0.9500 . ? 
C51 C52 1.504(5) . ? 
C52 H52A 0.9800 . ? 
C52 H52B 0.9800 . ? 
C52 H52C 0.9800 . ? 
 
loop_ 
 _geom_angle_atom_site_label_1 
 _geom_angle_atom_site_label_2 
 _geom_angle_atom_site_label_3 
 _geom_angle 
 _geom_angle_site_symmetry_1 
 _geom_angle_site_symmetry_3 
 _geom_angle_publ_flag 
N1 Ru1 O5 88.81(12) . . ? 
N1 Ru1 O6 93.09(12) . . ? 
O5 Ru1 O6 93.66(11) . . ? 
N1 Ru1 O2 92.21(11) . . ? 
O5 Ru1 O2 84.79(11) . . ? 
O6 Ru1 O2 174.45(10) . . ? 
N1 Ru1 O4 92.25(12) . . ? 
O5 Ru1 O4 178.60(10) . . ? 
O6 Ru1 O4 87.20(11) . . ? 
O2 Ru1 O4 94.25(11) . . ? 
N1 Ru1 O3 176.24(12) . 1 ? 
O5 Ru1 O3 87.43(11) . 1 ? 
O6 Ru1 O3 87.31(10) . 1 ? 
O2 Ru1 O3 87.30(10) . 1 ? 
O4 Ru1 O3 91.51(10) . 1 ? 
N1 Ru1 O3 176.24(12) . . ? 
O5 Ru1 O3 87.43(11) . . ? 
O6 Ru1 O3 87.31(10) . . ? 
O2 Ru1 O3 87.30(10) . . ? 
O4 Ru1 O3 91.51(10) . . ? 
O3 Ru1 O3 0.0(2) 1 . ? 
N3 Ru2 O12 88.32(12) . . ? 
N3 Ru2 O11 92.62(12) . . ? 
O12 Ru2 O11 93.69(11) . . ? 
N3 Ru2 O8 92.20(12) . . ? 
O12 Ru2 O8 84.14(10) . . ? 
O11 Ru2 O8 174.66(11) . . ? 
N3 Ru2 O9 91.72(12) . . ? 
O12 Ru2 O9 178.87(10) . . ? 
O11 Ru2 O9 87.43(11) . . ? 
O8 Ru2 O9 94.73(11) . . ? 
N3 Ru2 O10 175.98(12) . . ? 
O12 Ru2 O10 87.90(11) . . ? 
O11 Ru2 O10 86.26(11) . . ? 
O8 Ru2 O10 88.77(11) . . ? 
O9 Ru2 O10 92.09(11) . . ? 
C10 O2 Ru1 122.1(3) . . ? 
O3 O3 C20 0(10) 1 . ? 
O3 O3 Ru1 0(10) 1 . ? 
C20 O3 Ru1 124.1(2) . . ? 
C18 O4 Ru1 124.6(2) . . ? 
C25 O5 Ru1 123.2(3) . . ? 
C23 O6 Ru1 122.8(3) . . ? 
C36 O8 Ru2 119.9(2) . . ? 
C46 O9 Ru2 123.8(3) . . ? 
C44 O10 Ru2 123.6(3) . . ? 
C49 O11 Ru2 122.1(3) . . ? 
C51 O12 Ru2 122.6(3) . . ? 
C8 N1 C1 106.7(3) . . ? 
C8 N1 Ru1 123.1(3) . . ? 
C1 N1 Ru1 130.1(3) . . ? 
C9 N2 C16 109.3(3) . . ? 
C9 N2 H2 125.3 . . ? 
C16 N2 H2 125.3 . . ? 
C34 N3 C27 107.1(3) . . ? 
C34 N3 Ru2 122.8(3) . . ? 
C27 N3 Ru2 130.0(3) . . ? 
C42 N4 C35 109.1(3) . . ? 
C42 N4 H4A 125.5 . . ? 
C35 N4 H4A 125.5 . . ? 
C2 C1 C6 121.0(4) . . ? 
C2 C1 N1 128.0(4) . . ? 
C6 C1 N1 110.9(3) . . ? 
C1 C2 C3 117.7(4) . . ? 
C1 C2 H2A 121.2 . . ? 
C3 C2 H2A 121.2 . . ? 
C4 C3 C2 121.8(4) . . ? 
C4 C3 H3 119.1 . . ? 
C2 C3 H3 119.1 . . ? 
C3 C4 C5 120.2(4) . . ? 
C3 C4 H4 119.9 . . ? 
C5 C4 H4 119.9 . . ? 
C6 C5 C4 118.2(4) . . ? 
C6 C5 H5 120.9 . . ? 
C4 C5 H5 120.9 . . ? 
C5 C6 C1 120.8(4) . . ? 
C5 C6 C7 131.6(4) . . ? 
C1 C6 C7 107.5(3) . . ? 
O1 C7 C6 130.5(4) . . ? 
O1 C7 C8 126.2(4) . . ? 
C6 C7 C8 103.2(3) . . ? 
N1 C8 C9 123.8(4) . . ? 
N1 C8 C7 111.3(3) . . ? 
C9 C8 C7 124.8(4) . . ? 
C8 C9 N2 125.3(4) . . ? 
C8 C9 C10 125.9(4) . . ? 
N2 C9 C10 108.4(3) . . ? 
O2 C10 C9 126.4(4) . . ? 
O2 C10 C11 127.6(4) . . ? 
C9 C10 C11 106.0(3) . . ? 
C16 C11 C12 120.5(4) . . ? 
C16 C11 C10 107.1(3) . . ? 
C12 C11 C10 132.3(4) . . ? 
C13 C12 C11 117.5(4) . . ? 
C13 C12 H12 121.3 . . ? 
C11 C12 H12 121.3 . . ? 
C14 C13 C12 120.7(4) . . ? 
C14 C13 H13 119.6 . . ? 
C12 C13 H13 119.6 . . ? 
C15 C14 C13 122.7(4) . . ? 
C15 C14 H14 118.6 . . ? 
C13 C14 H14 118.6 . . ? 
C14 C15 C16 116.9(4) . . ? 
C14 C15 H15 121.6 . . ? 
C16 C15 H15 121.6 . . ? 
N2 C16 C15 129.2(4) . . ? 
N2 C16 C11 109.2(3) . . ? 
C15 C16 C11 121.6(4) . . ? 
C18 C17 H17A 109.5 . . ? 
C18 C17 H17B 109.5 . . ? 
H17A C17 H17B 109.5 . . ? 
C18 C17 H17C 109.5 . . ? 
H17A C17 H17C 109.5 . . ? 
H17B C17 H17C 109.5 . . ? 
O4 C18 C19 126.0(4) . . ? 
O4 C18 C17 115.2(3) . . ? 
C19 C18 C17 118.8(4) . . ? 
C20 C19 C18 126.9(4) . . ? 
C20 C19 H19 116.5 . . ? 
C18 C19 H19 116.5 . . ? 
O3 C20 O3 0.0(4) 1 . ? 
O3 C20 C19 126.2(4) 1 . ? 
O3 C20 C19 126.2(4) . . ? 
O3 C20 C21 113.7(3) 1 . ? 
O3 C20 C21 113.7(3) . . ? 
C19 C20 C21 120.1(4) . . ? 
C20 C21 H21A 109.5 . . ? 
C20 C21 H21B 109.5 . . ? 
H21A C21 H21B 109.5 . . ? 
C20 C21 H21C 109.5 . . ? 
H21A C21 H21C 109.5 . . ? 
H21B C21 H21C 109.5 . . ? 
C23 C22 H22A 109.5 . . ? 
C23 C22 H22B 109.5 . . ? 
H22A C22 H22B 109.5 . . ? 
C23 C22 H22C 109.5 . . ? 
H22A C22 H22C 109.5 . . ? 
H22B C22 H22C 109.5 . . ? 
O6 C23 C24 126.1(4) . . ? 
O6 C23 C22 114.0(4) . . ? 
C24 C23 C22 119.9(4) . . ? 
C23 C24 C25 126.7(4) . . ? 
C23 C24 H24 116.7 . . ? 
C25 C24 H24 116.7 . . ? 
O5 C25 C24 126.2(4) . . ? 
O5 C25 C26 115.3(4) . . ? 
C24 C25 C26 118.5(4) . . ? 
C25 C26 H26A 109.5 . . ? 
C25 C26 H26B 109.5 . . ? 
H26A C26 H26B 109.5 . . ? 
C25 C26 H26C 109.5 . . ? 
H26A C26 H26C 109.5 . . ? 
H26B C26 H26C 109.5 . . ? 
C28 C27 C32 120.8(4) . . ? 
C28 C27 N3 128.1(4) . . ? 
C32 C27 N3 111.0(4) . . ? 
C29 C28 C27 117.8(4) . . ? 
C29 C28 H28 121.1 . . ? 
C27 C28 H28 121.1 . . ? 
C28 C29 C30 121.6(4) . . ? 
C28 C29 H29 119.2 . . ? 
C30 C29 H29 119.2 . . ? 
C29 C30 C31 120.1(4) . . ? 
C29 C30 H30 119.9 . . ? 
C31 C30 H30 119.9 . . ? 
C32 C31 C30 118.6(4) . . ? 
C32 C31 H31 120.7 . . ? 
C30 C31 H31 120.7 . . ? 
C31 C32 C27 120.9(4) . . ? 
C31 C32 C33 131.9(4) . . ? 
C27 C32 C33 107.0(4) . . ? 
O7 C33 C32 129.7(4) . . ? 
O7 C33 C34 126.3(4) . . ? 
C32 C33 C34 104.0(3) . . ? 
N3 C34 C35 123.1(4) . . ? 
N3 C34 C33 110.6(3) . . ? 
C35 C34 C33 126.1(4) . . ? 
N4 C35 C34 125.0(4) . . ? 
N4 C35 C36 108.6(3) . . ? 
C34 C35 C36 125.9(4) . . ? 
O8 C36 C35 126.5(4) . . ? 
O8 C36 C37 127.3(4) . . ? 
C35 C36 C37 106.2(3) . . ? 
C38 C37 C42 120.3(4) . . ? 
C38 C37 C36 133.6(4) . . ? 
C42 C37 C36 106.0(3) . . ? 
N4 C42 C41 128.9(4) . . ? 
N4 C42 C37 110.0(3) . . ? 
C41 C42 C37 121.0(4) . . ? 
C40 C41 C42 117.7(4) . . ? 
C40 C41 H41 121.2 . . ? 
C42 C41 H41 121.2 . . ? 
C41 C40 C39 122.1(4) . . ? 
C41 C40 H40 119.0 . . ? 
C39 C40 H40 119.0 . . ? 
C38 C39 C40 120.2(4) . . ? 
C38 C39 H39 119.9 . . ? 
C40 C39 H39 119.9 . . ? 
C39 C38 C37 118.7(4) . . ? 
C39 C38 H38 120.6 . . ? 
C37 C38 H38 120.6 . . ? 
C44 C43 H43A 109.5 . . ? 
C44 C43 H43B 109.5 . . ? 
H43A C43 H43B 109.5 . . ? 
C44 C43 H43C 109.5 . . ? 
H43A C43 H43C 109.5 . . ? 
H43B C43 H43C 109.5 . . ? 
O10 C44 C45 125.6(4) . . ? 
O10 C44 C43 115.2(4) . . ? 
C45 C44 C43 119.2(4) . . ? 
C44 C45 C46 126.9(4) . . ? 
C44 C45 H45 116.6 . . ? 
C46 C45 H45 116.6 . . ? 
O9 C46 C45 126.6(4) . . ? 
O9 C46 C47 113.5(4) . . ? 
C45 C46 C47 119.9(4) . . ? 
C46 C47 H47A 109.5 . . ? 
C46 C47 H47B 109.5 . . ? 
H47A C47 H47B 109.5 . . ? 
C46 C47 H47C 109.5 . . ? 
H47A C47 H47C 109.5 . . ? 
H47B C47 H47C 109.5 . . ? 
C49 C48 H48A 109.5 . . ? 
C49 C48 H48B 109.5 . . ? 
H48A C48 H48B 109.5 . . ? 
C49 C48 H48C 109.5 . . ? 
H48A C48 H48C 109.5 . . ? 
H48B C48 H48C 109.5 . . ? 
O11 C49 C50 126.3(4) . . ? 
O11 C49 C48 114.5(4) . . ? 
C50 C49 C48 119.2(4) . . ? 
C51 C50 C49 126.5(4) . . ? 
C51 C50 H50 116.8 . . ? 
C49 C50 H50 116.8 . . ? 
O12 C51 C50 126.2(4) . . ? 
O12 C51 C52 114.4(4) . . ? 
C50 C51 C52 119.4(4) . . ? 
C51 C52 H52A 109.5 . . ? 
C51 C52 H52B 109.5 . . ? 
H52A C52 H52B 109.5 . . ? 
C51 C52 H52C 109.5 . . ? 
H52A C52 H52C 109.5 . . ? 
H52B C52 H52C 109.5 . . ? 
 
loop_ 
 _geom_torsion_atom_site_label_1 
 _geom_torsion_atom_site_label_2 
 _geom_torsion_atom_site_label_3 
 _geom_torsion_atom_site_label_4 
 _geom_torsion 
 _geom_torsion_site_symmetry_1 
 _geom_torsion_site_symmetry_2 
 _geom_torsion_site_symmetry_3 
 _geom_torsion_site_symmetry_4 
 _geom_torsion_publ_flag 
N1 Ru1 O2 C10 24.9(3) . . . . ? 
O5 Ru1 O2 C10 -63.7(3) . . . . ? 
O6 Ru1 O2 C10 -137.7(10) . . . . ? 
O4 Ru1 O2 C10 117.3(3) . . . . ? 
O3 Ru1 O2 C10 -151.4(3) 1 . . . ? 
O3 Ru1 O2 C10 -151.4(3) . . . . ? 
N1 Ru1 O3 O3 0.0(13) . . . 1 ? 
O5 Ru1 O3 O3 0.0(3) . . . 1 ? 
O6 Ru1 O3 O3 0.0(3) . . . 1 ? 
O2 Ru1 O3 O3 0.0(3) . . . 1 ? 
O4 Ru1 O3 O3 0.0(3) . . . 1 ? 
N1 Ru1 O3 C20 174.7(16) . . . . ? 
O5 Ru1 O3 C20 172.3(3) . . . . ? 
O6 Ru1 O3 C20 78.5(3) . . . . ? 
O2 Ru1 O3 C20 -102.8(3) . . . . ? 
O4 Ru1 O3 C20 -8.6(3) . . . . ? 
O3 Ru1 O3 C20 0.0(17) 1 . . . ? 
N1 Ru1 O4 C18 -174.0(3) . . . . ? 
O5 Ru1 O4 C18 47(4) . . . . ? 
O6 Ru1 O4 C18 -81.0(3) . . . . ? 
O2 Ru1 O4 C18 93.6(3) . . . . ? 
O3 Ru1 O4 C18 6.2(3) 1 . . . ? 
O3 Ru1 O4 C18 6.2(3) . . . . ? 
N1 Ru1 O5 C25 83.5(3) . . . . ? 
O6 Ru1 O5 C25 -9.5(3) . . . . ? 
O2 Ru1 O5 C25 175.8(3) . . . . ? 
O4 Ru1 O5 C25 -137(4) . . . . ? 
O3 Ru1 O5 C25 -96.7(3) 1 . . . ? 
O3 Ru1 O5 C25 -96.7(3) . . . . ? 
N1 Ru1 O6 C23 -77.5(3) . . . . ? 
O5 Ru1 O6 C23 11.5(3) . . . . ? 
O2 Ru1 O6 C23 85.1(12) . . . . ? 
O4 Ru1 O6 C23 -169.6(3) . . . . ? 
O3 Ru1 O6 C23 98.7(3) 1 . . . ? 
O3 Ru1 O6 C23 98.7(3) . . . . ? 
N3 Ru2 O8 C36 -31.1(3) . . . . ? 
O12 Ru2 O8 C36 57.0(3) . . . . ? 
O11 Ru2 O8 C36 123.3(11) . . . . ? 
O9 Ru2 O8 C36 -123.0(3) . . . . ? 
O10 Ru2 O8 C36 145.0(3) . . . . ? 
N3 Ru2 O9 C46 170.2(3) . . . . ? 
O12 Ru2 O9 C46 -98(6) . . . . ? 
O11 Ru2 O9 C46 77.7(3) . . . . ? 
O8 Ru2 O9 C46 -97.4(3) . . . . ? 
O10 Ru2 O9 C46 -8.5(3) . . . . ? 
N3 Ru2 O10 C44 -148.5(16) . . . . ? 
O12 Ru2 O10 C44 -168.4(3) . . . . ? 
O11 Ru2 O10 C44 -74.6(3) . . . . ? 
O8 Ru2 O10 C44 107.4(3) . . . . ? 
O9 Ru2 O10 C44 12.7(3) . . . . ? 
N3 Ru2 O11 C49 75.3(3) . . . . ? 
O12 Ru2 O11 C49 -13.2(3) . . . . ? 
O8 Ru2 O11 C49 -79.0(12) . . . . ? 
O9 Ru2 O11 C49 166.9(3) . . . . ? 
O10 Ru2 O11 C49 -100.8(3) . . . . ? 
N3 Ru2 O12 C51 -76.9(3) . . . . ? 
O11 Ru2 O12 C51 15.6(3) . . . . ? 
O8 Ru2 O12 C51 -169.3(3) . . . . ? 
O9 Ru2 O12 C51 -169(5) . . . . ? 
O10 Ru2 O12 C51 101.7(3) . . . . ? 
O5 Ru1 N1 C8 60.2(3) . . . . ? 
O6 Ru1 N1 C8 153.8(3) . . . . ? 
O2 Ru1 N1 C8 -24.5(3) . . . . ? 
O4 Ru1 N1 C8 -118.9(3) . . . . ? 
O3 Ru1 N1 C8 57.8(18) 1 . . . ? 
O3 Ru1 N1 C8 57.8(18) . . . . ? 
O5 Ru1 N1 C1 -115.4(3) . . . . ? 
O6 Ru1 N1 C1 -21.8(3) . . . . ? 
O2 Ru1 N1 C1 159.8(3) . . . . ? 
O4 Ru1 N1 C1 65.5(3) . . . . ? 
O3 Ru1 N1 C1 -117.8(17) 1 . . . ? 
O3 Ru1 N1 C1 -117.8(17) . . . . ? 
O12 Ru2 N3 C34 -55.9(3) . . . . ? 
O11 Ru2 N3 C34 -149.5(3) . . . . ? 
O8 Ru2 N3 C34 28.2(3) . . . . ? 
O9 Ru2 N3 C34 123.0(3) . . . . ? 
O10 Ru2 N3 C34 -75.8(17) . . . . ? 
O12 Ru2 N3 C27 119.6(3) . . . . ? 
O11 Ru2 N3 C27 26.0(3) . . . . ? 
O8 Ru2 N3 C27 -156.3(3) . . . . ? 
O9 Ru2 N3 C27 -61.5(3) . . . . ? 
O10 Ru2 N3 C27 99.8(17) . . . . ? 
C8 N1 C1 C2 171.5(4) . . . . ? 
Ru1 N1 C1 C2 -12.4(6) . . . . ? 
C8 N1 C1 C6 -6.1(4) . . . . ? 
Ru1 N1 C1 C6 170.1(3) . . . . ? 
C6 C1 C2 C3 -3.5(6) . . . . ? 
N1 C1 C2 C3 179.1(4) . . . . ? 
C1 C2 C3 C4 0.0(6) . . . . ? 
C2 C3 C4 C5 3.1(6) . . . . ? 
C3 C4 C5 C6 -2.7(6) . . . . ? 
C4 C5 C6 C1 -0.7(6) . . . . ? 
C4 C5 C6 C7 177.2(4) . . . . ? 
C2 C1 C6 C5 4.0(6) . . . . ? 
N1 C1 C6 C5 -178.3(3) . . . . ? 
C2 C1 C6 C7 -174.5(4) . . . . ? 
N1 C1 C6 C7 3.3(4) . . . . ? 
C5 C6 C7 O1 0.7(8) . . . . ? 
C1 C6 C7 O1 178.9(4) . . . . ? 
C5 C6 C7 C8 -177.6(4) . . . . ? 
C1 C6 C7 C8 0.5(4) . . . . ? 
C1 N1 C8 C9 -170.0(4) . . . . ? 
Ru1 N1 C8 C9 13.5(5) . . . . ? 
C1 N1 C8 C7 6.4(4) . . . . ? 
Ru1 N1 C8 C7 -170.1(3) . . . . ? 
O1 C7 C8 N1 177.2(4) . . . . ? 
C6 C7 C8 N1 -4.4(4) . . . . ? 
O1 C7 C8 C9 -6.5(7) . . . . ? 
C6 C7 C8 C9 171.9(4) . . . . ? 
N1 C8 C9 N2 178.6(4) . . . . ? 
C7 C8 C9 N2 2.7(6) . . . . ? 
N1 C8 C9 C10 7.1(6) . . . . ? 
C7 C8 C9 C10 -168.8(4) . . . . ? 
C16 N2 C9 C8 -172.0(4) . . . . ? 
C16 N2 C9 C10 0.8(5) . . . . ? 
Ru1 O2 C10 C9 -14.3(5) . . . . ? 
Ru1 O2 C10 C11 167.0(3) . . . . ? 
C8 C9 C10 O2 -6.5(7) . . . . ? 
N2 C9 C10 O2 -179.3(4) . . . . ? 
C8 C9 C10 C11 172.4(4) . . . . ? 
N2 C9 C10 C11 -0.4(4) . . . . ? 
O2 C10 C11 C16 178.7(4) . . . . ? 
C9 C10 C11 C16 -0.2(4) . . . . ? 
O2 C10 C11 C12 -3.4(7) . . . . ? 
C9 C10 C11 C12 177.7(4) . . . . ? 
C16 C11 C12 C13 -0.9(6) . . . . ? 
C10 C11 C12 C13 -178.5(4) . . . . ? 
C11 C12 C13 C14 -1.0(6) . . . . ? 
C12 C13 C14 C15 1.9(7) . . . . ? 
C13 C14 C15 C16 -0.9(7) . . . . ? 
C9 N2 C16 C15 179.7(4) . . . . ? 
C9 N2 C16 C11 -1.0(5) . . . . ? 
C14 C15 C16 N2 178.3(4) . . . . ? 
C14 C15 C16 C11 -1.0(6) . . . . ? 
C12 C11 C16 N2 -177.5(3) . . . . ? 
C10 C11 C16 N2 0.7(4) . . . . ? 
C12 C11 C16 C15 1.9(6) . . . . ? 
C10 C11 C16 C15 -179.9(4) . . . . ? 
Ru1 O4 C18 C19 -1.1(5) . . . . ? 
Ru1 O4 C18 C17 178.9(2) . . . . ? 
O4 C18 C19 C20 -4.9(7) . . . . ? 
C17 C18 C19 C20 175.1(4) . . . . ? 
Ru1 O3 C20 O3 0(100) . . . 1 ? 
O3 O3 C20 C19 0.00(10) 1 . . . ? 
Ru1 O3 C20 C19 6.3(6) . . . . ? 
O3 O3 C20 C21 0.0(2) 1 . . . ? 
Ru1 O3 C20 C21 -175.5(2) . . . . ? 
C18 C19 C20 O3 1.9(7) . . . 1 ? 
C18 C19 C20 O3 1.9(7) . . . . ? 
C18 C19 C20 C21 -176.2(4) . . . . ? 
Ru1 O6 C23 C24 -7.0(5) . . . . ? 
Ru1 O6 C23 C22 173.7(2) . . . . ? 
O6 C23 C24 C25 -4.1(7) . . . . ? 
C22 C23 C24 C25 175.2(4) . . . . ? 
Ru1 O5 C25 C24 2.8(5) . . . . ? 
Ru1 O5 C25 C26 -176.3(2) . . . . ? 
C23 C24 C25 O5 6.5(7) . . . . ? 
C23 C24 C25 C26 -174.4(4) . . . . ? 
C34 N3 C27 C28 -169.7(4) . . . . ? 
Ru2 N3 C27 C28 14.2(6) . . . . ? 
C34 N3 C27 C32 6.4(4) . . . . ? 
Ru2 N3 C27 C32 -169.6(3) . . . . ? 
C32 C27 C28 C29 1.7(6) . . . . ? 
N3 C27 C28 C29 177.5(4) . . . . ? 
C27 C28 C29 C30 2.0(6) . . . . ? 
C28 C29 C30 C31 -3.2(7) . . . . ? 
C29 C30 C31 C32 0.5(6) . . . . ? 
C30 C31 C32 C27 3.1(6) . . . . ? 
C30 C31 C32 C33 -171.2(4) . . . . ? 
C28 C27 C32 C31 -4.3(6) . . . . ? 
N3 C27 C32 C31 179.2(3) . . . . ? 
C28 C27 C32 C33 171.3(4) . . . . ? 
N3 C27 C32 C33 -5.2(4) . . . . ? 
C31 C32 C33 O7 -1.1(7) . . . . ? 
C27 C32 C33 O7 -176.0(4) . . . . ? 
C31 C32 C33 C34 176.9(4) . . . . ? 
C27 C32 C33 C34 2.0(4) . . . . ? 
C27 N3 C34 C35 170.5(4) . . . . ? 
Ru2 N3 C34 C35 -13.1(5) . . . . ? 
C27 N3 C34 C33 -5.0(4) . . . . ? 
Ru2 N3 C34 C33 171.5(2) . . . . ? 
O7 C33 C34 N3 -180.0(4) . . . . ? 
C32 C33 C34 N3 1.9(4) . . . . ? 
O7 C33 C34 C35 4.7(7) . . . . ? 
C32 C33 C34 C35 -173.4(4) . . . . ? 
C42 N4 C35 C34 173.6(4) . . . . ? 
C42 N4 C35 C36 1.4(4) . . . . ? 
N3 C34 C35 N4 178.8(3) . . . . ? 
C33 C34 C35 N4 -6.5(6) . . . . ? 
N3 C34 C35 C36 -10.3(6) . . . . ? 
C33 C34 C35 C36 164.5(4) . . . . ? 
Ru2 O8 C36 C35 20.1(5) . . . . ? 
Ru2 O8 C36 C37 -161.9(3) . . . . ? 
N4 C35 C36 O8 178.1(3) . . . . ? 
C34 C35 C36 O8 5.9(7) . . . . ? 
N4 C35 C36 C37 -0.2(4) . . . . ? 
C34 C35 C36 C37 -172.4(4) . . . . ? 
O8 C36 C37 C38 4.7(7) . . . . ? 
C35 C36 C37 C38 -177.0(4) . . . . ? 
O8 C36 C37 C42 -179.3(4) . . . . ? 
C35 C36 C37 C42 -1.0(4) . . . . ? 
C35 N4 C42 C41 177.9(4) . . . . ? 
C35 N4 C42 C37 -2.0(4) . . . . ? 
C38 C37 C42 N4 178.5(3) . . . . ? 
C36 C37 C42 N4 1.9(4) . . . . ? 
C38 C37 C42 C41 -1.4(6) . . . . ? 
C36 C37 C42 C41 -178.1(3) . . . . ? 
N4 C42 C41 C40 -178.5(4) . . . . ? 
C37 C42 C41 C40 1.4(6) . . . . ? 
C42 C41 C40 C39 -0.3(6) . . . . ? 
C41 C40 C39 C38 -0.8(6) . . . . ? 
C40 C39 C38 C37 0.8(6) . . . . ? 
C42 C37 C38 C39 0.3(6) . . . . ? 
C36 C37 C38 C39 175.9(4) . . . . ? 
Ru2 O10 C44 C45 -11.1(6) . . . . ? 
Ru2 O10 C44 C43 166.9(2) . . . . ? 
O10 C44 C45 C46 0.8(7) . . . . ? 
C43 C44 C45 C46 -177.1(4) . . . . ? 
Ru2 O9 C46 C45 2.2(6) . . . . ? 
Ru2 O9 C46 C47 -177.4(3) . . . . ? 
C44 C45 C46 O9 4.3(7) . . . . ? 
C44 C45 C46 C47 -176.1(4) . . . . ? 
Ru2 O11 C49 C50 4.0(6) . . . . ? 
Ru2 O11 C49 C48 -176.3(3) . . . . ? 
O11 C49 C50 C51 9.0(8) . . . . ? 
C48 C49 C50 C51 -170.7(4) . . . . ? 
Ru2 O12 C51 C50 -9.0(6) . . . . ? 
Ru2 O12 C51 C52 171.2(3) . . . . ? 
C49 C50 C51 O12 -6.1(8) . . . . ? 
C49 C50 C51 C52 173.6(4) . . . . ? 
 
loop_ 
 _geom_hbond_atom_site_label_D 
 _geom_hbond_atom_site_label_H 
 _geom_hbond_atom_site_label_A 
 _geom_hbond_distance_DH 
 _geom_hbond_distance_HA 
 _geom_hbond_distance_DA 
 _geom_hbond_angle_DHA 
 _geom_hbond_site_symmetry_A 
N2 H2 O1  0.88 2.39 2.922(4) 118.8 . 
N4 H4A O7  0.88 2.44 2.961(4) 118.2 . 
N4 H4A O3  0.88 2.14 2.905(4) 145.2 1 
 
_diffrn_measured_fraction_theta_max    0.995 
_diffrn_reflns_theta_full              25.00 
_diffrn_measured_fraction_theta_full   0.995 
_refine_diff_density_max    1.066 
_refine_diff_density_min   -1.257 
_refine_diff_density_rms    0.108 
